# Supplementary material for: Effects of CCL5 on the biological behavior of breast cancer and the mechanisms of its interaction with tumor-associated macrophages
Source: PubMed Central journal article supplement — Oncol Rep. 2019 Oct 1;42(6):2499–511. doi: 10.3892/or.2019.7344 (PMC6826325; doi:10.3892/or.2019.7344), 2019-10-01
Supplement: Supplementary_Data.pdf [file Supplementary_Data.pdf]

Table SI. Expression levels of CCL5 and the clinicopathological features in breast cancer by immunohistochemically staining.

| Pathological parameters              | Case no. | Expression of CCL5 |          | $\chi^2$ -value | P-value            |
|--------------------------------------|----------|--------------------|----------|-----------------|--------------------|
|                                      |          | Negative           | Positive |                 |                    |
| Age (years)                          |          |                    |          |                 | 0.192              |
| ≤50                                  | 27       | 7                  | 20       | 2.242           |                    |
| >50                                  | 38       | 13                 | 25       |                 |                    |
| TNM stage                            |          |                    |          |                 | 0.008 <sup>b</sup> |
| I-II                                 | 29       | 14                 | 15       | 7.534           |                    |
| III-IV                               | 36       | 6                  | 30       |                 |                    |
| Lymph node status                    |          |                    |          |                 | 0.015 <sup>b</sup> |
| Non-metastasis                       | 33       | 15                 | 18       | 6.786           |                    |
| Metastasis                           | 32       | 5                  | 27       |                 |                    |
| Hormone receptor status <sup>a</sup> |          |                    |          |                 | 0.435              |
| Negative                             | 31       | 8                  | 23       | 0.685           |                    |
| Positive                             | 34       | 12                 | 22       |                 |                    |
| Her-2 status                         |          |                    |          |                 | 0.213              |
| Negative                             | 40       | 21                 | 19       | 1.087           |                    |
| Positive                             | 25       | 9                  | 16       |                 |                    |

<sup>a</sup>Estrogen receptor or progesterone receptor positive is considered as positive for hormone receptor. <sup>b</sup>The difference was statistically significant (P<0.05). CCL5, C-C motif chemokine ligand 5; TNM, tumor-node-metastasis.

Table SII. The number of macrophages in a section of the xenograft tumor.

| Section | Control group (cell number) |    |    |    |    | Average | Anti-CCL5 group (cell number) |    |    |    |    | Average |
|---------|-----------------------------|----|----|----|----|---------|-------------------------------|----|----|----|----|---------|
| 1       | 36                          | 39 | 40 | 33 | 42 | 38      | 25                            | 30 | 29 | 25 | 26 | 27      |
| 2       | 30                          | 27 | 31 | 28 | 24 | 28      | 22                            | 19 | 18 | 23 | 18 | 20      |
| 3       | 37                          | 42 | 40 | 43 | 38 | 40      | 31                            | 34 | 35 | 30 | 30 | 32      |
| 4       | 33                          | 34 | 33 | 29 | 31 | 32      | 40                            | 37 | 45 | 41 | 37 | 38      |
| 5       | 37                          | 38 | 32 | 33 | 30 | 34      | 28                            | 32 | 34 | 29 | 27 | 30      |

CCL5, C-C motif chemokine ligand 5.
